# Supplementary figures and images for: Circulating Blood-Brain Barrier Proteins for Differentiating Ischaemic Stroke Patients from Stroke Mimics
Source: Preprints.org preprint supplement (doi:10.20944/preprints202409.1569.v1), 2024-09-20

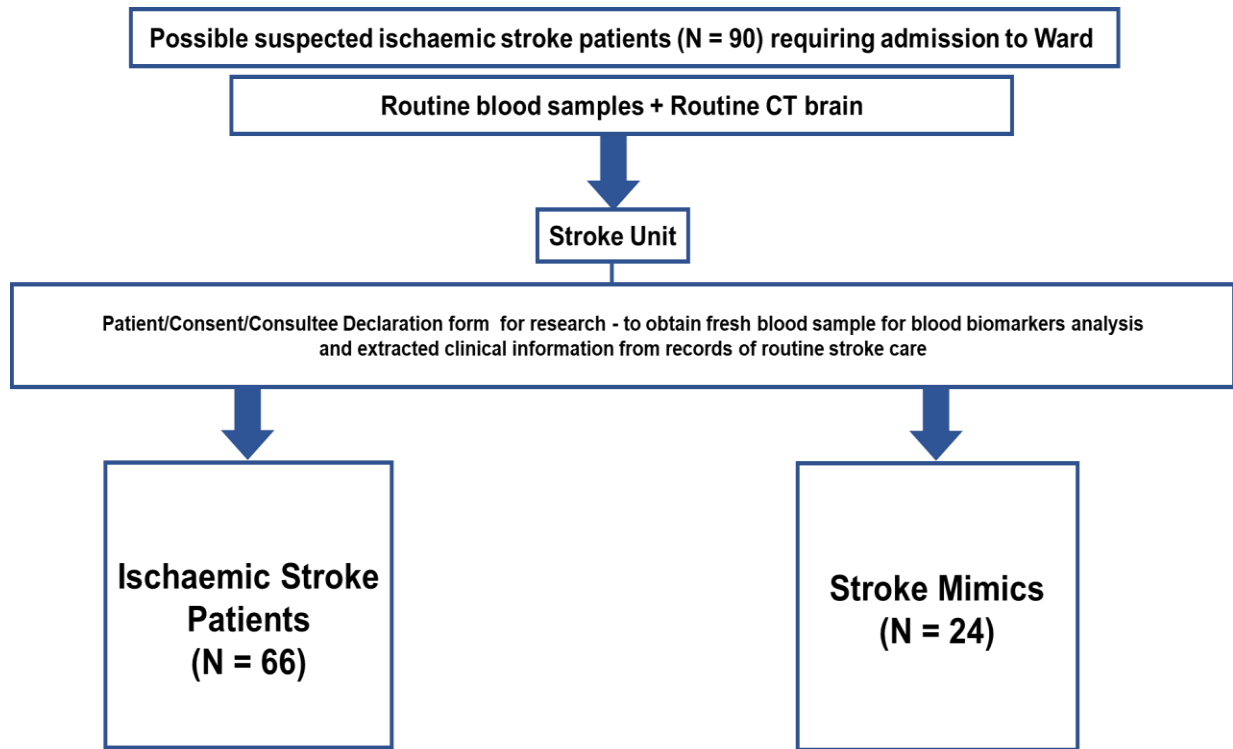

**Figure S1: Flow diagram.** Design of the study and patients' routine clinical pathways.

Supplement: Supplementary file 1 [file supplementary]
